# Supplementary material for: Additional Assessment of Fecal Corticosterone Metabolites Improves Visual Rating in the Evaluation of Stress Responses of Laboratory Rats
Source: MDPI journal article supplement (doi:10.3390/ani11030710), 2021-03-05
Supplement: s1 [file s1]

**S1 Table: Absolute fecal corticosterone metabolite (FCM) concentrations and calculation of bias for a 12 sampling period with sampling time at midnight**

| Delay after end of<br>shifting and<br>sample collection<br>in days      | Midnight sample<br>(12h sampling period) | Noon sample<br>(12h sampling period) | Calculated<br>24h sample | Relative difference<br>(%) between<br>calculated 24h<br>sample and<br>midnight sample |
|-------------------------------------------------------------------------|------------------------------------------|--------------------------------------|--------------------------|---------------------------------------------------------------------------------------|
| <b>FCM concentrations in ng/0.05g feces (mean ± standard deviation)</b> |                                          |                                      |                          |                                                                                       |
| 8                                                                       | 1668 ± 619                               | 1049 ± 274                           | 1358.5                   | 18.56                                                                                 |
| 9                                                                       | 1704 ± 766                               | 1056 ± 349                           | 1380.0                   | 19.01                                                                                 |
| 15                                                                      | 1686 ± 464                               | 1063 ± 365                           | 1374.5                   | 18.48                                                                                 |
| 16                                                                      | 1695 ± 474                               | 1188 ± 326                           | 1441.5                   | 14.96                                                                                 |
| Mean ± standard deviation                                               |                                          |                                      |                          | 17.75 ± 1.88                                                                          |

n=16, FCM, fecal corticosterone metabolites
