# Supplementary material for: Additional Assessment of Fecal Corticosterone Metabolites Improves Visual Rating in the Evaluation of Stress Responses of Laboratory Rats
Source: MDPI journal article supplement (doi:10.3390/ani11030710), 2021-03-05
Supplement: s1 [file s1]

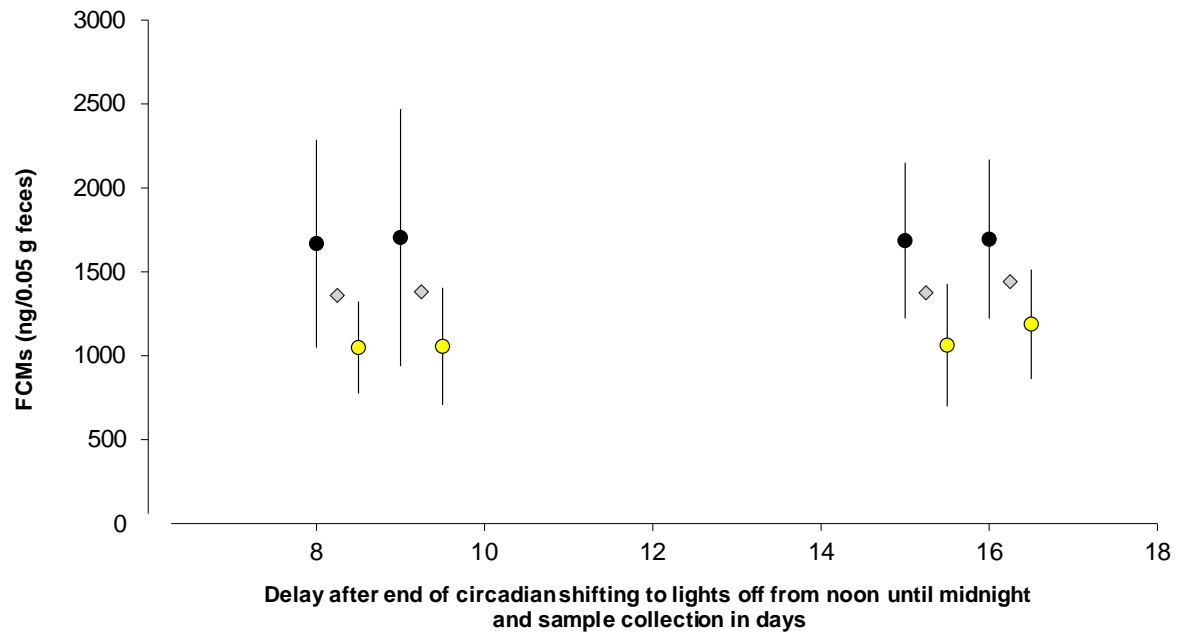

**Figure S1: Circadian rhythmicity of fecal corticosterone metabolite (FCM) concentrations analyzed one and two weeks after end of shifting of the circadian cycle to lights off from noon until midnight.** Dark circles depict samples collected at midnight; yellow circles represent samples collected at noon. Each circle mirrors FCM concentrations for a sampling period of 12 hours, corresponding to the inactive and active phase of the animals. Values are given as mean  $\pm$  standard deviation,  $n=16$ . Grey diamonds shows calculated mean values for a 24h sampling period, which were used to determine the circadian bias for the 12 hour sampling period to detect response to 12 hours of sleep deprivation.
